# Supplementary material
Source: PubMed Central journal article supplement (PMC2397376)
Supplement: 107.122242_1.pdf [file 107.122242_1.pdf]

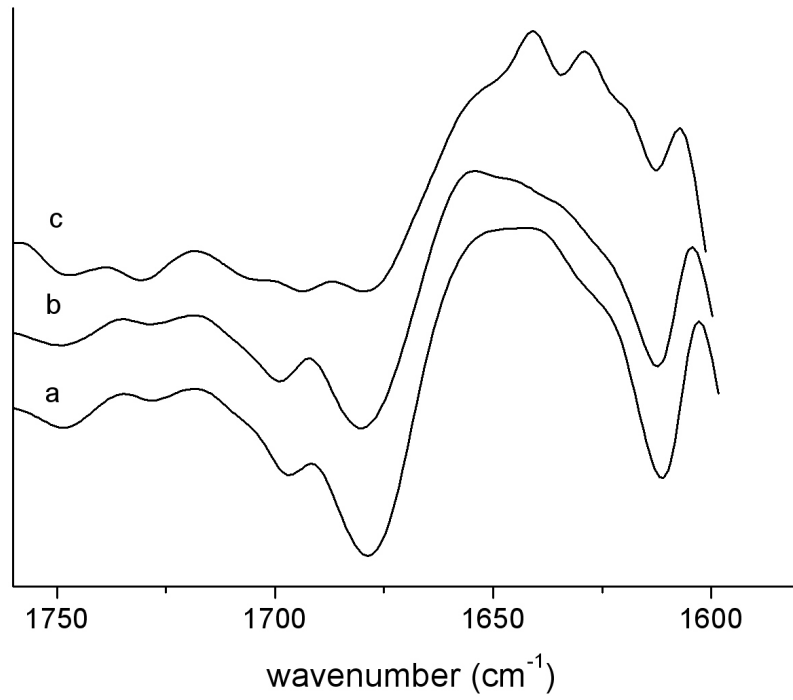

FIGURE S1: CP43 SADS obtained from target analysis on the a) D2-His197Gln mutant, b) WT and c) D2-His197Ala mutant.

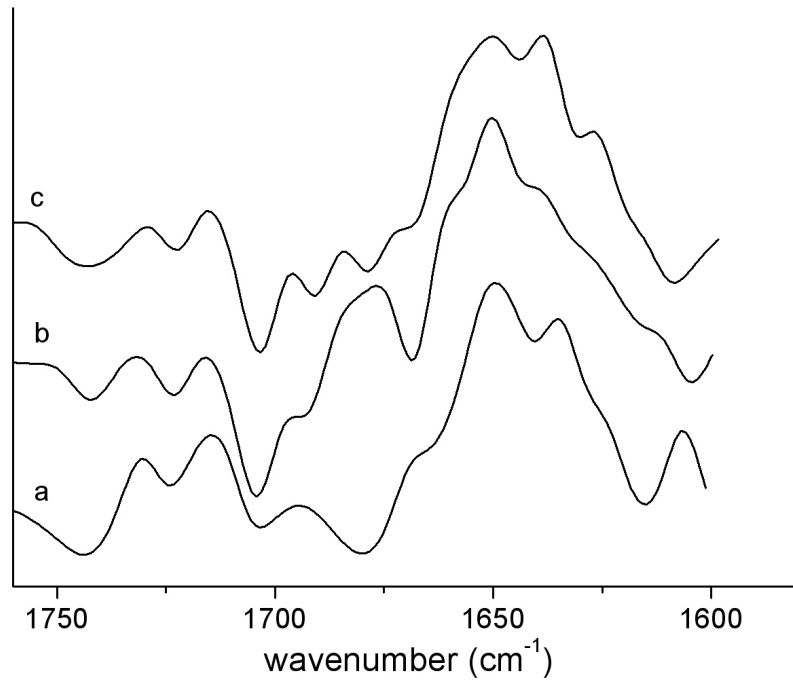

FIGURE S2: CP47 SADS obtained from target analysis on a) D2-His197Ala mutant, b) WT and c) D2-His197Gln mutant.

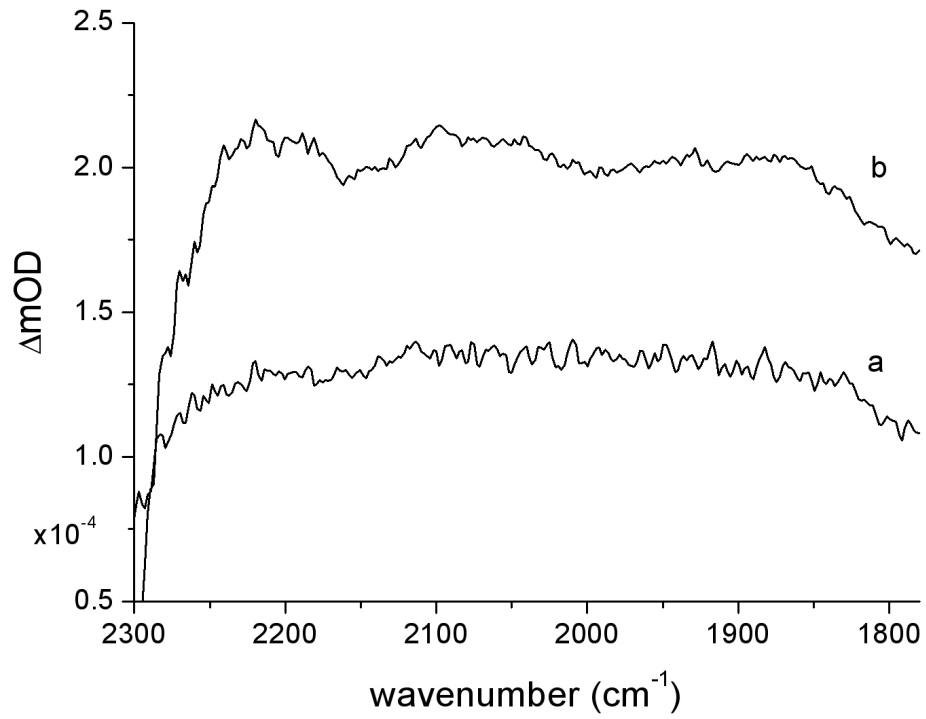

FIGURE S3:  $\text{P}_{680}^+/\text{P}_{680}$  Intervalence band measured by light induced FTIR spectroscopy for a) wild type PS2 core from *Synechocystis* SP6803 and b) D2-His197Ala mutant.
